# Supplementary material for: A statistical study of the magnetic signatures of the unique Tonga volcanic explosion of 15 January 2022
Source: Copernicus journal article supplement (doi:10.5194/angeo-2023-27), 2023-08-16
Supplement: Supplementary file [file angeo-2023-27-AC4-supplement.pdf]

Dear Dr. Adrian Hitchman,

Thank you very much for your comment.

Regarding the disturbances in the magnetic-field record at each observatory that we identify as being caused by the volcanic eruption, they do appear to be features common to an active geomagnetic field. Moreover, these features do not have any specific appearance, and their appearances have nothing to do with the volcanic explosion.

The detection of the disturbances is based on revealing the disturbances, which have propagated with the same propagation speeds to all nineteen observatories. Altogether, six apparent speeds of 4 km/s, 1.5 km/s, 1 km/s, as well as 500 m/s, 313 m/s, and 200 m/s have been identified in a simultaneous analysis, for the first time.

The best evidence that the bay-shaped and quasi-periodic disturbances are caused by the action of the volcano is the dependence of the time delay on distance from the volcano. These dependences are already presented in Figures 21 and 24 in the manuscript.

Figure 21 shows the time delay of bay disturbance vs distance from the volcano and the estimated regression line superimposed on the scatter plot, while Figure 24 shows the time delay of the onset of quasi-periodic disturbances in the geomagnetic field vs distance from the volcano and the estimated regression line superimposed on the scatter plot.

The time delay vs distance from the volcano is also illustrated in the figure below, which we have constructed especially for you:

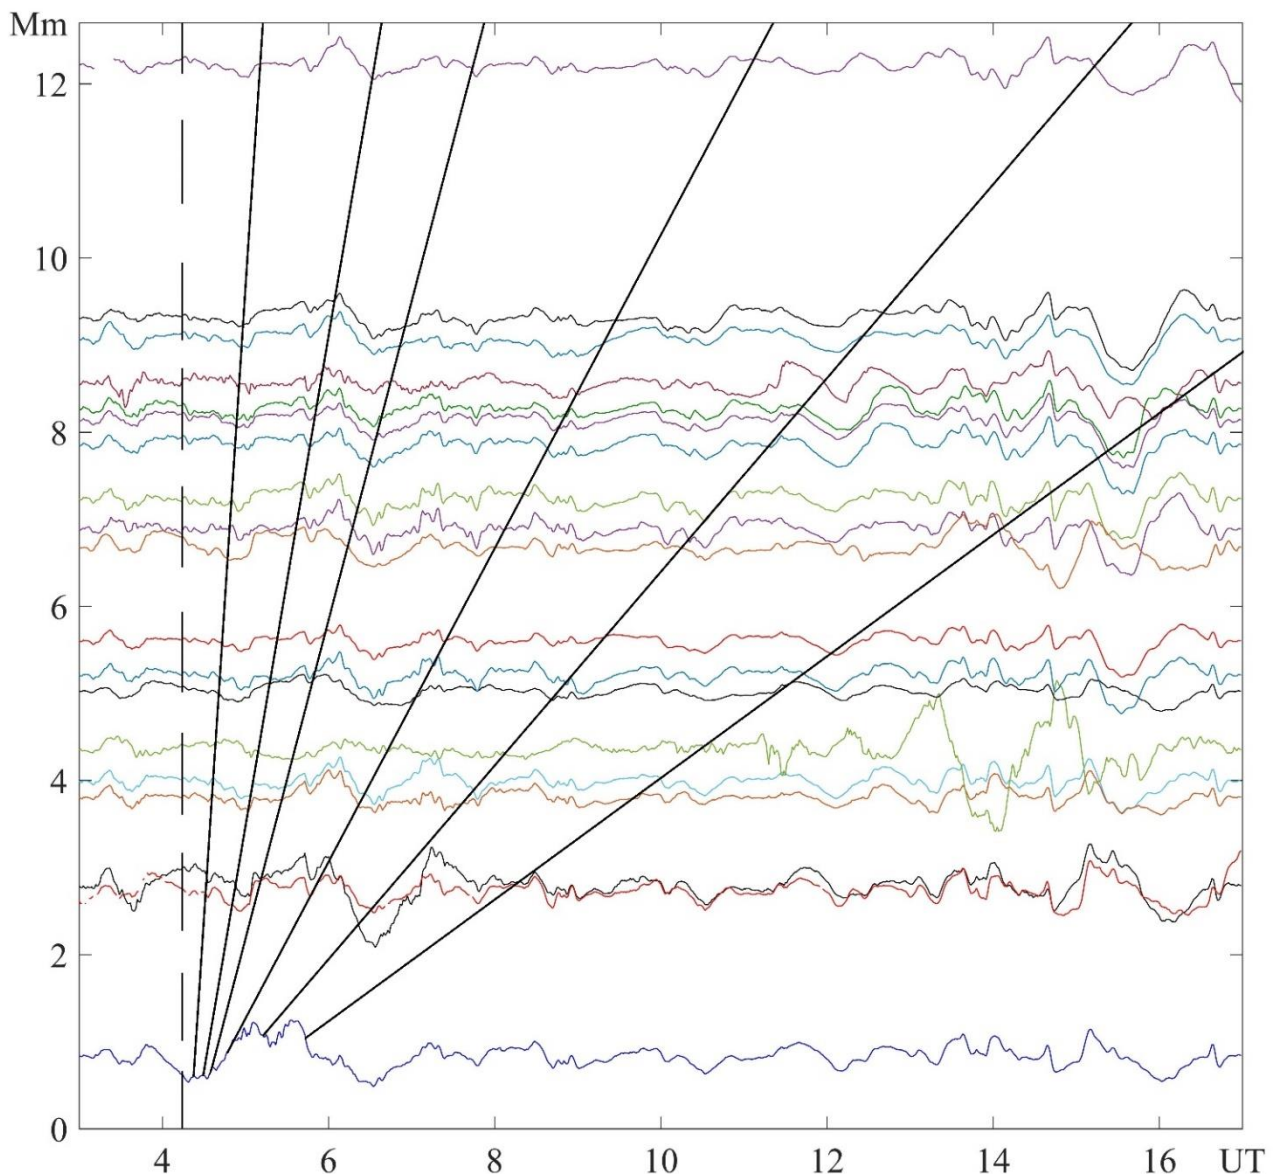

As an example, this figure shows UT variations in all 19 X-components of the geomagnetic field together, in the UT vs distance from the volcano plane. The vertical dashed line indicates the moment

of the volcanic explosion, while the six oblique straight regression lines virtually connect the possible moments of the onset of the magnetic field response indicated by the arrows in Figures 2–20. These variations have already been presented separately in Figures 2–20. Thus, these data clearly show that the disturbance time delay exhibits a tendency to increase with distance from the volcano, which testifies to the disturbance being propagated from the volcano. Moreover, we were able to establish that the bay-shaped disturbance of the geomagnetic field is associated with an ionospheric “hole” caused by a volcanic explosion and described, for example, in

Astafyeva, E., Maletckii, B., Mikesell, T. D., Munaibari, E., Ravanelli, M., Coisson, P., Manta, F., Rolland, L.: The 15 January 2022 Hunga Tonga eruption history as inferred from ionospheric observations, *Geophysical Research Letters*, 49 (10), e2022GL098827. <https://doi.org/10.1029/2022GL098827>, 2022.

Chernogor, L. F.: Ionospheric total electron content variations caused by the Tonga volcano explosion of January 15, 2022, *Space Science and Technology*, 29(3), 67-87, <https://doi.org/10.15407/knit2023.03.067>, 2023b.

The algorithm for finding the geomagnetic field response to the Tonga volcanic explosion is presented in the manuscript (Line 114–128), and the apparent speeds and the time delays found through applying the algorithm are collected in Table 3 (Line 158).

Other aspects of this study include the following.

1. Before searching for volcano effects, I carefully analyzed the state of space weather, for which I have developed a special format (see Fig. 1 at the end of this reply). Fig. 1 shows that a magnetic storm with  $K_p = 6- \approx 5.667$  occurred on January 14, 2022. From 00:00 UTC to 03:00 UTC on January 15, 2022, the  $K_p$ -index decreased to  $4+ \approx 4.333$ . Within the time interval of interest, approximately from 05:00 UTC to 18:00 UTC, the  $K_p$  values varied within the 1.667–3 range, i.e., there was no magnetic storm, the magnetic field was only slightly disturbed. On the reference days,  $K_p \approx 0.333-1$  (January 13, 2022), and  $K_p \approx 0.667-2.333$  (January 17, 2022). January 13, 2022, was ideal as a quiet time reference. Solar activity on January 15 was 10–15 units higher than on the reference days, however, this could only affect the trend level, but not the bay-shaped disturbance or quasiperiodic disturbances of the magnetic field.

2. A simple comparison of the temporal variations on January 13 and 15 shows that on January 13 the variations were smooth, and their amplitude did not exceed 1 nT (see, e.g., Figure 2 in the manuscript). On January 15, the magnitude and frequency of fluctuations increased significantly. Their amplitude was 1–3 nT.

3. The review of the literature on the geomagnetic field perturbations from the volcanic explosion is presented in the Introduction section (Line 44–73) of the manuscript, which I copy here for your convenience:

“Sun et al. (2022b) have estimated disturbances in the electric current in the ionospheric  $E$  region caused by the Tonga volcanic explosion by making use of the data on geomagnetic field variations acquired by the global network of magnetometers. The  $E$ -region current density was estimated to be  $J \approx 22-55$  mA/m<sup>2</sup> within a radius of 8,000 km away from the eruption, which changed the eastward components,  $Y$ , of the geomagnetic field by  $\sim 20-50$  nT. The leading front of the disturbance traveled with a propagation speed of  $\sim 740$  m/s. Le et al. (2022) investigated the effect that the volcano had on the equatorial electrojet and revealed the reversal of the electrojet direction due to a strong eastward zonal wind.

The explosion was also accompanied by variations in the geomagnetic field (Adushkin et al., 2022; Chernogor, 2023c; Chernogor and Holub, 2023a, 2023b; Iyemori et al., 2022; Le et al., 2022; Schnepf et al., 2022; Soares et al., 2022; Yamazaki et al., 2022). Adushkin et al. (2022) have described waves and disturbances in the atmospheric electric and magnetic fields. The data collected at 14 stations in the global network of observatories, INTERMAGNET, which are located in the 2.790–

6.225 Mm distance range from the volcano, have been used for investigating the magnetic effect. The disturbances in the geomagnetic field have been deduced to occur on a global scale, and two groups of disturbance have been revealed. In the first group, the disturbances were virtually synchronously observed immediately after the explosion, whereas in the second group, the magnetic disturbances appeared after the arrival of Lamb waves. Soares et al. (2022) described quasi-periodic disturbances in the magnitude of the eastward component,  $Y$ , with amplitude of  $\sim 3$  nT and an  $\sim 4$ -min period observed with onset time delay of 10 min at 835-km distance from the volcano. The geomagnetic variations at 3.8-mHz (period of  $T \approx 4.4$  min) have been analyzed by (Iyemori et al., 2022; Yamazaki et al., 2022), who relate these variations to the acoustic resonance. It is important to note that the oscillations at 3.8 mHz were observed simultaneously both in the vicinity of the volcano (API station) and in the magnetically conjugate region (HON station). The amplitudes of these virtually synchronous oscillations were observed to be 2 nT and 0.2 nT, respectively, while the time delay of the magnetic effect did not exceed 6 min. However, analogous oscillations were not observed at distances,  $r$ , greater than 2.7 Mm. The study by Schnepf et al. (2022) is concerned with the investigation of geomagnetic variations in the 3–8-min period range with amplitude of  $\sim 1$  nT that were observed with a time delay of  $\sim 30$  min (propagation speed of  $\sim 470$  m/s). The authors relate these variations to the ionospheric wave, which was generated by the volcano, and explain the variations in the 13–93- and 5–100-min period ranges by the effects of tsunami and of atmospheric and ionospheric sources. Harding et al. (2022) describe the multi-instrument studies of the magnetic effect of Tonga volcano. They utilized the data collected by magnetometers at the ground and onboard the ICON and Swarm spacecraft to study the effect that the volcanic explosion had on neutral winds and the ionospheric dynamo current system on a global scale. Despite significant progress made in understanding the geomagnetic field disturbances related to the Tonga volcanic explosion, a further statistical and spectral analyses of these variations is to advance understanding of this scientific issue.”

Further, I present excerpts from the papers, which had already been published before the study described in the manuscript. They illustrate individual elements of the geomagnetic effect of the Tonga volcanic explosion, as follows:

The conclusions arrived at the study by Schnepf, N. R., Minami, T., Toh, H., and Nair, M. C.: Magnetic Signatures of the 15 January 2022 Hunga Tonga–Hunga Ha'apai Volcanic Eruption, *Geophysical Research Letters*, 49 (10), e2022GL098454, <https://doi.org/10.1029/2022GL098454>, 2022 are of interest to the current study with respect to characterizing disturbed geomagnetic conditions:



## 4. Conclusions and Outlook

15 January 2022 started and ended with disturbed geomagnetic conditions but conditions were relatively quiet around the time of the Hunga Tonga–Hunga Ha’apai eruption and stayed quiet through to when oceanic and atmospheric waves from the explosion reached the various Pacific geomagnetic observatories.

The local magnetic signature at API had periods of 3–8 min and strengths of  $\sim 1$  nT arrived starting at 04:44 UTC and persisting until 05:38 UTC. The high frequency signature was visible in both API’s vertical and horizontal components, suggesting an ionospheric origin. However, oceanic signals could be at play here and more work is needed to definitively separate the sources.

For Chichijima Island (CBI, Japan) and Easter Island (IPM, Chile), the local magnetic signals were concurrent with the eruption’s water wave arrivals. At CBI, the magnetic signatures had period bands of 13–19 min (with corresponding amplitudes of 0.4–0.7 nT) and 49–93 min (with corresponding amplitudes of 1.8–2.4 nT). Meanwhile, at IPM, we identified magnetic signatures of 5–100+ min periodicity and 5–14 nT amplitude. It is unclear whether the signals at CBI and IPM are due to the eruption’s tsunami water wave, deformation of the sea surface from atmospheric acoustic waves, ionospheric waves, or combinations of all these eruption-induced sources.

The Honolulu (HON) and Tahiti (PPT) observatories lacked clear magnetic signals concurrent with their island’s water wave arrival time. Instead, similar to the other more inland observatories used in this study, recurrent magnetic signals were seen for the bulk of January 15th. These signals must be external in origin, however, it is ambiguous if they are related to the Hunga Tonga–Hunga Ha’apai eruption or to Earth’s space weather conditions.

Future studies should pursue methods that separate internal and external magnetic field sources at each of the near-sea observatories. Additionally, incorporating atmospheric pressure data or ionospheric total electron content data could help distinguish the different sources creating the identified magnetic signatures. Numerical studies may also shed light in separating the magnetic signal from the tsunami water wave and the ionospheric disturbances. With such future work, we believe that the magnetic signatures from submarine volcanic eruptions can be rendered sensible.

The study by Adushkin, V. V., Rybnov, Y. S., and Spivak, A. A.: Wave-Related, Electrical, and Magnetic Effects Due to the January 15, 2022 Catastrophic Eruption of Hunga Tonga–Hunga Ha’apai Volcano, *J. Volcanolog. Seismol.*, 16 (4), 251–263. <https://doi.org/10.1134/S0742046322040029>, 2022. deals with the observations of perturbations in the atmosphere and in the geomagnetic field at global-scale distances from the volcanic explosion. The following excerpts from this paper are of interest (marked in yellow):

the period between  $\sim 04:10$  and  $\sim 05:00$  UTC in the shape of sign-varying variations with a period of  $\sim 60$  s and peak amplitude  $\sim 20$  V/m.

$\sim 10$  V/m.

### THE GEOMAGNETIC EFFECT OF THE VOLCANIC ERUPTION

It is known that violent volcanic activity gives rise to increased variations in the Earth’s magnetic field (Johnston, 1997; Spivak et al, 2020). The results of the present study also provide evidence that the explosion

The results of instrumental observations show that, along with the explosion, the anomalous variations in the electrical field were also caused by wave disturbances of direct and antipodal origin. Figure 10 demonstrates variations in  $E$  due to the arrival of the larger signals  $P_1$ – $P_4$  at the GMC. In particular, it follows from Fig. 10a that the arrival of the primary signal  $P_1$  (arrival time  $\sim 18:25$  UTC) gave rise to well-pronounced sign-varying variations in  $E$  with a period of  $\sim 8$  min and peak amplitude  $\sim 40$  V/m. The variations in  $E$  corresponding to the arrival of signals  $P_2$ – $P_4$  at the GMC are displayed in Figs. 10b–10d, respectively. The characteristics of electrical variations due to the arrival of signals  $P_1$ – $P_4$  are given in Table 3 as the amplitudes relative to the trend  $E^*$  and period  $T$ . It should be noted that the sign-varying  $E$  variations

**Table 3.** Characteristics of electrical variations during arrivals of atmospheric signals  $P_1$ – $P_4$  at the GMC

| Signal | Parameters |             |
|--------|------------|-------------|
|        | $T$ , min  | $E^*$ , V/m |
| $P_1$  | $\sim 8$   | $\sim 40$   |
| $P_2$  | $\sim 4$   | $\sim 20$   |
| $P_3$  | $\sim 20$  | $\sim 20$   |
| $P_4$  | $\sim 6$   | $\sim 10$   |

of Hunga Tonga–Hunga Ha’apai Volcano was accompanied by anomalous geomagnetic variations that occurred at great distances from the volcano. As an illustration, Figs. 11 and 12 show observations of the horizontal magnetic component (which is the most sensitive to external disturbances)

$B_H = \sqrt{B_x^2 + B_y^2}$ , made at the INTERMAGNET observatories at different distances from the volcano in the east–west and north–south directions, respectively (see Fig. 1). Inspection of Figs. 11 and 12 tells us that there is a well-pronounced change in the behavior of  $B_H$  during the explosion in the shape of sign-varying variations whose duration reached ~60 min. We note that the anomalous variations were observed practically simultaneously at very different epicentral distances from the volcano, thus showing that the excited disturbance was global in character.

According to Spivak et al. (2020), geomagnetic variations were also observed when atmospheric signals arrived at recording sites. We will consider the geomagnetic effect that accompanied the signals  $P_1–P_6$  using the MHV data. Figure 13 shows the geomagnetic variations at MHV that were recorded both during the volcanic explosion and when atmospheric signals arrived at the MHV. It should be noted that, overall, the variations in  $B_H$  were recorded exactly during the explosion period and during the periods when atmospheric signals arrived.

The observed advance or delay in the geomagnetic variations relative to the times of arrival of the atmospheric signals can probably be explained by geophysical conditions, both along the propagation paths and at the recording sites.

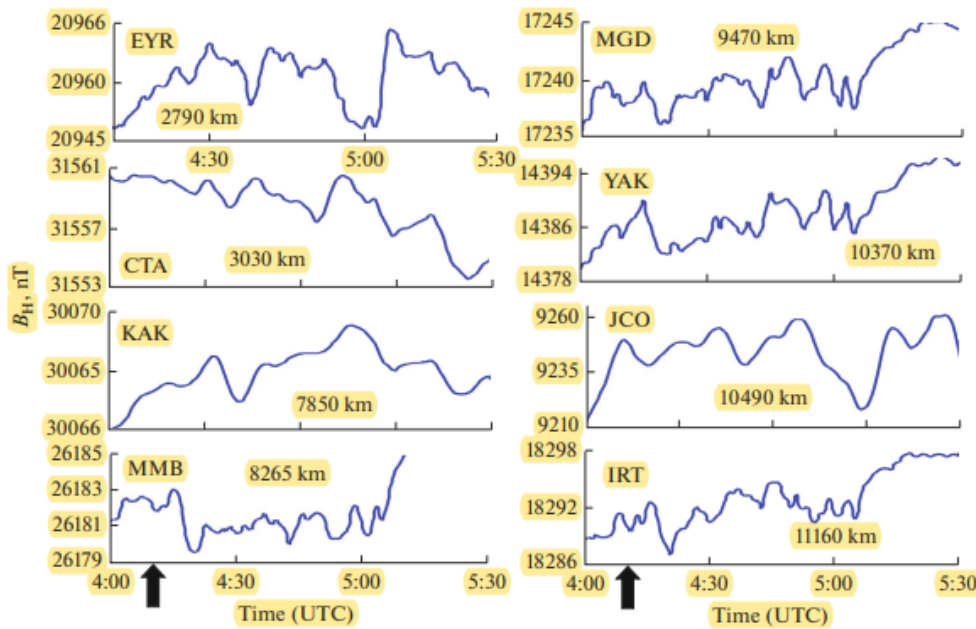

**Fig. 11.** Variations in the horizontal component of the Earth’s magnetic field during the January 15, 2022 explosion at Hunga Tonga–Hunga Ha’apai (the records were made at INTERMAGNET observatories situated east–west relative to the volcano); the epicentral distance is shown in the figures themselves (vertical arrows mark the explosion time).

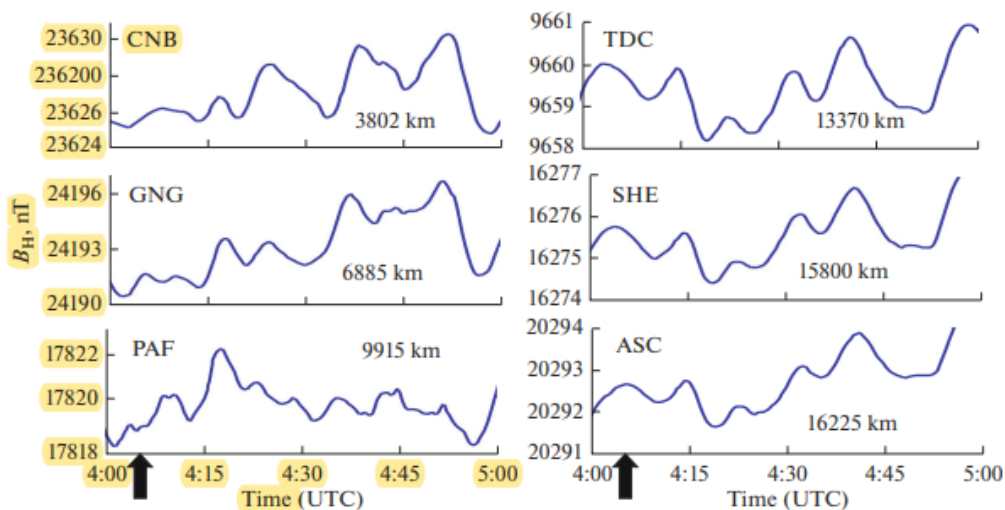

**Fig. 12.** Variations in the horizontal component of the Earth’s magnetic field during the January 15, 2022 explosion of Hunga Tonga–Hunga Ha’apai (the records were made at the INTERMAGNET observatories situated east and west of the volcano); the epicentral distances are shown in the figures themselves (vertical arrows mark the explosion time).



ones. That is to say, the atmospheric signal has traveled thrice around the globe, thus showing that the source energy was substantially above the value 50 Mt.

At the same time, we can also find the estimate from below for  $W$  in application to the Hunga Tonga–Hunga Ha’apai eruption using data on the explosive eruption of Bezymianny Volcano (March 30, 1956) as reported in (Pasechnik, 1958; Pasechnik and Fedoseenko, 1958). The spectrum of the atmospheric signal due to the Bezymianny explosion is shown in Fig. 14. The value of  $f_0$  is  $\sim 0.003$  Hz for this case. The energy of the Bezymianny explosion as found in (Pasechnik and Fedoseenko, 1958) is  $W \approx 10^{16}$  J, or  $\sim 2.4$  Mt of TNT. The estimates based on (1) gave  $W \sim 3.8 \times 10^{16}$  J, or  $\sim 9$  Mt, which is  $\sim 3.5$  times the value reported in (Pasechnik and Fedoseenko, 1958). Bearing this in mind, we find that the estimate from below for  $W$  in the explosion of Hunga Tonga–Hunga Ha’apai Volcano can amount to  $W \sim 2.6 \times 10^{17}$  J, or  $\sim 60$  Mt of TNT.

Further, it should be noted that it is not entirely clear at present what is the mechanism responsible for effects of volcanic eruptions on the Earth’s magnetic and electrical fields. Local effects can apparently be attributed to intensive discharges of hot material into the atmosphere. However, the “long-range action” of volcanic explosions as found in the present study requires further more detailed research. It can be hypothesized that, as water–ash–gas mixture is violently emitted during the explosive phase of an eruption, a source of strong acoustic and electrical excitation acting on the ionosphere is being formed in the near-ground zone of the Earth. The result is to produce a magnetohydrodynamic disturbance at the epicenter of the source; the disturbance propagates at a great speed in the ionosphere (e.g.,  $\sim 22$  km/s (Sorokin and Fedorovich, 1982)).

The results of this study show that the air waves excited by the activity of a volcano, both direct and antipodal waves, also produce disturbances in the

It is also important to mention that this volcanic explosion produced significant variations in electrical and magnetic fields at considerable distances from the source of the disturbances. As well, the variations in the geophysical fields considered here were observed, not only during the explosion itself, but also when the atmospheric signals were arriving at recording sites.

It is difficult at present to offer a distinct physical interpretation for these effects. This problem requires further data acquisition and detailed analyses of the data. Also, it is necessary to develop analytical and calculable models of the process based on concrete mechanisms responsible for the action of volcanic explosion on the medium.

In our opinion, the above results provide a supplement to the relevant data base, and can be of interest for improving the existing models and developing new models to describe the action of volcanic activity on the geophysical medium and their verification.

#### FUNDING

This work was supported by the state assignment no. 1021052706233-4-1.5.4 “The Occurrence of Natural and Manmade Processes in Geophysical Fields (FMWN-2022-0012)”.

#### REFERENCES

- Adushkin, A.A. and Firstov, P.P., Explosive processes of volcanic eruptions and their manifestations in wave disturbances in the atmosphere, in *Ekstremalnye prirodnye yavleniya i katastrofy* (Extreme Natural Occurrences and Disasters), vol. 2, Moscow: IFZ RAN, 2010, pp. 264–278.
- Adushkin, V.V. and Spivak, A.A., Impact of natural extreme events on geophysical fields in the environment, *Izvestiya, Physics of the Solid Earth*, 2021, vol. 57, no. 5, pp. 583–592.
- Adushkin, V.V., Gostintsev, Yu.A., and Firstov, P.P., On the origin of air waves due to strong explosive eruptions, *Vulkanol. Seismol.*, 1984, no. 5, pp. 3–11.

The study presented in the paper by Soares, G., Yamazaki, Y., and Matzka, J.: Localized geomagnetic disturbance due to ionospheric response to the Hunga Tonga eruption on January 15, 2022, *Geophysical Research Letters*, <https://doi.org/10.1002/essoar.10510482.1>, 2022 reaches the conclusion that ionospheric currents are the likely cause of the geomagnetic disturbance at Apia:

#### 19 Abstract

20 The Hunga Tonga-Hunga Ha’apai volcano in the Pacific Ocean erupted on January 15, 2022. The  
21 energy released by this submarine eruption caused waves propagating through the lithosphere,  
22 ocean and atmosphere. Less than 10 minutes after the eruption, pulsation-like geomagnetic  
23 disturbances started at the geomagnetic observatory Apia, approximately 835 km from Hunga  
24 Tonga, and lasted for about 2 hours. These disturbances were most prominent in the Y (east)  
25 component, with an oscillation amplitude of  $\sim 3$  nT and dominant periods of 276, 254 and 219 s.  
26 Comparable geomagnetic disturbances are absent at neighboring as well as high-latitude  
27 geomagnetic observatories, indicating that the disturbances are localized and not related to solar  
28 wind energy input. Tide gauge data show that tsunami waves arrived at Apia more than one hour  
29 after the eruption. This leaves ionospheric currents as the likely cause of the geomagnetic  
30 disturbances.

The study by Yamazaki, Y., Soares, G., and Matzka, J.: Geomagnetic Detection of the Atmospheric Acoustic Resonance at 3.8 mHz During the Hunga Tonga Eruption Event on 15 January 2022, *Journal of Geophysical Research: Space Physics*, 127 (7), e2022JA030540, <https://doi.org/10.1029/2022JA030540>, 2022 arrives at the conclusion that the geomagnetic variation at Apia is most likely due to ionospheric dynamo currents driven by the acoustic resonance of the atmosphere:

## JGR Space Physics

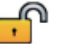

### RESEARCH ARTICLE

10.1029/2022JA030540

#### Key Points:

- The effect of the January 2022 Hunga Tonga-Hunga Ha'apai volcano eruption on the geomagnetic field is examined
- Geomagnetic oscillation with a frequency of ~3.8 mHz is observed simultaneously near the volcano and its magnetic conjugate point
- The oscillation is attributed to the acoustic resonance of the atmosphere

#### Correspondence to:

Y. Yamazaki,  
[yamazaki@iap-kborn.de](mailto:yamazaki@iap-kborn.de)

#### Citation:

Yamazaki, Y., Soares, G., & Matzka, J. (2022). Geomagnetic detection of the atmospheric acoustic resonance at 3.8 mHz during the Hunga Tonga eruption event on 15 January 2022. *Journal of Geophysical Research: Space Physics*, 127, e2022JA030540. <https://doi.org/10.1029/2022JA030540>

Received 8 APR 2022  
Accepted 22 JUN 2022

## Geomagnetic Detection of the Atmospheric Acoustic Resonance at 3.8 mHz During the Hunga Tonga Eruption Event on 15 January 2022

Yosuke Yamazaki<sup>1</sup> , Gabriel Soares<sup>2</sup> , and Jürgen Matzka<sup>3</sup>

<sup>1</sup>Leibniz Institute of Atmospheric Physics at the University of Rostock, Kühlungsborn, Germany, <sup>2</sup>Observatório Nacional, Rio de Janeiro, Brazil, <sup>3</sup>GFZ German Research Centre for Geosciences, Potsdam, Germany

**Abstract** Modeling studies have predicted that the acoustic resonance of the atmosphere during geophysical events such as earthquakes and volcanos can lead to an oscillation of the geomagnetic field with a frequency of about 4 mHz. However, observational evidence is still limited due to scarcity of suitable events. On 15 January 2022, the submarine volcano Hunga Tonga-Hunga Ha'apai (20.5°S, 175.4°W, Tonga) erupted in the Pacific Ocean and caused severe atmospheric disturbance, providing an opportunity to investigate geomagnetic effects associated with acoustic resonance. Following the eruption, geomagnetic oscillation is observed at Apia, approximately 835 km from Hunga Tonga, mainly in the Pc 5 band (150–600 s, or 1.7–6.7 mHz) lasting for about 2 hr. The dominant frequency of the oscillation is 3.8 mHz, which is consistent with the frequency of the atmospheric oscillation due to acoustic resonance. The oscillation is most prominent in the eastward (Y) component, with an amplitude of ~3 nT, which is much larger than those previously reported for other events (<1 nT). Comparably large oscillation is not found at other stations located further away (>2700 km). However, geomagnetic oscillation with a much smaller amplitude (~0.3 nT) is observed at Honolulu, which is located near the magnetic conjugate point of Hunga Tonga, in a similar wave form as at Apia, indicating interhemispheric coupling. This is the first time that geomagnetic oscillations due to the atmospheric acoustic resonance are simultaneously detected at magnetic conjugate points.

### 1. Introduction

The paper by Iyemori, T., Nishioka, M., Otsuka, Y., et al.: A confirmation of vertical acoustic resonance and field-aligned current generation just after the 2022 Hunga Tonga Hunga Ha'apai volcanic eruption, *Earth Planets Space*, 74, 103, <https://doi.org/10.1186/s40623-022-01653-y>, 2022 examines the geomagnetic oscillations at Apia and Honolulu caused by the volcanic explosion in detail. We copied below only three excerpts from this paper:



# A confirmation of vertical acoustic resonance and field-aligned current generation just after the 2022 Hunga Tonga Hunga Ha'apai volcanic eruption

Toshihiko Iyemori<sup>1\*</sup>, Michi Nishioka<sup>2</sup>, Yuichi Otsuka<sup>3</sup> and Atsuki Shinbori<sup>3</sup>

## Abstract

A strong volcanic eruption caused a clear vertical acoustic resonance between the sea surface and the thermosphere. Its effects are observed as geomagnetic and GPS-TEC oscillations near the volcano and its geomagnetic conjugate area. The geomagnetic oscillations are observed at Apia and Honolulu geomagnetic observatories with amplitude of about 2 nT and 0.2 nT, respectively. The volcanic eruption started around 04:14 UT on January 15, 2022. The oscillations appeared at 04:21 UT at Apia, Samoa, only about 7 min after the start of eruption. Because the distance between the volcano and Apia is about 841 km, it takes about 40 min for a sound wave to propagate from the volcano to Apia. Therefore, it is more plausible to assume that the magnetic oscillation observed at Apia about 7 min after the eruption is caused by the sound waves propagated vertically upward to the ionosphere and generated an electric current. The coherent appearance of geomagnetic oscillation at Honolulu located near the geomagnetic conjugate point of the volcano strongly support the idea that the ionospheric current generated over the volcano diverted as a field-aligned current which flew to the opposite hemisphere and caused the geomagnetic oscillation at Honolulu. The earliest start of GPS-TEC oscillation was around 04:15 UT near the volcanic eruption, and it was around 04:20 UT at KOKV station in Hawaii. The time-lag of the TEC variations between Samoa and Hawaii obtained by a cross-correlation analysis is 4.5 min or 8.5 min. These time differences are much smaller than the travel time of the seismic waves from the

The statement above (marked in blue) is confirmed by the entire paper, while Figures 2 and 10 below present the data:

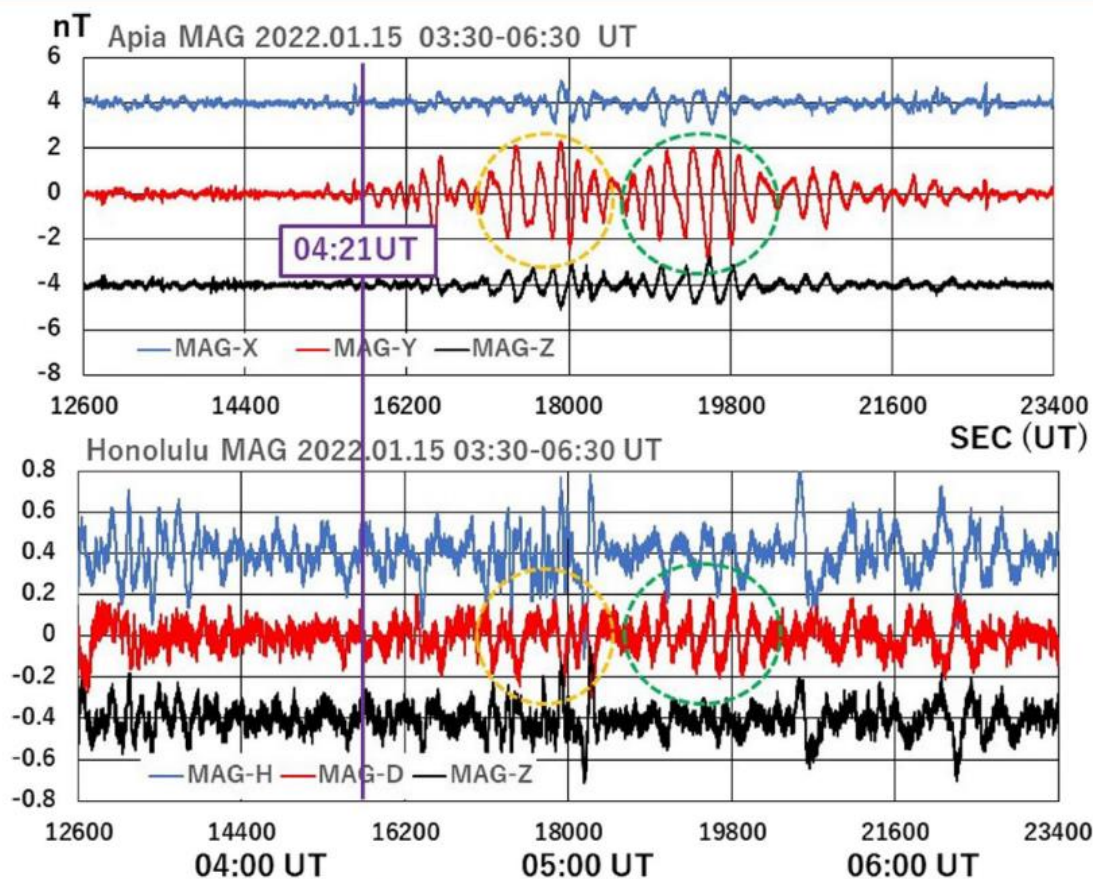

**Fig. 2** Enlarged plots of high-pass filtered geomagnetic components. An oscillation at Apia start around 04:21 UT, about 7 min after the start of eruption. Although the amplitude is small, coherent oscillations with those in Apia encircled by orange and green dotted lines are observed at Honolulu



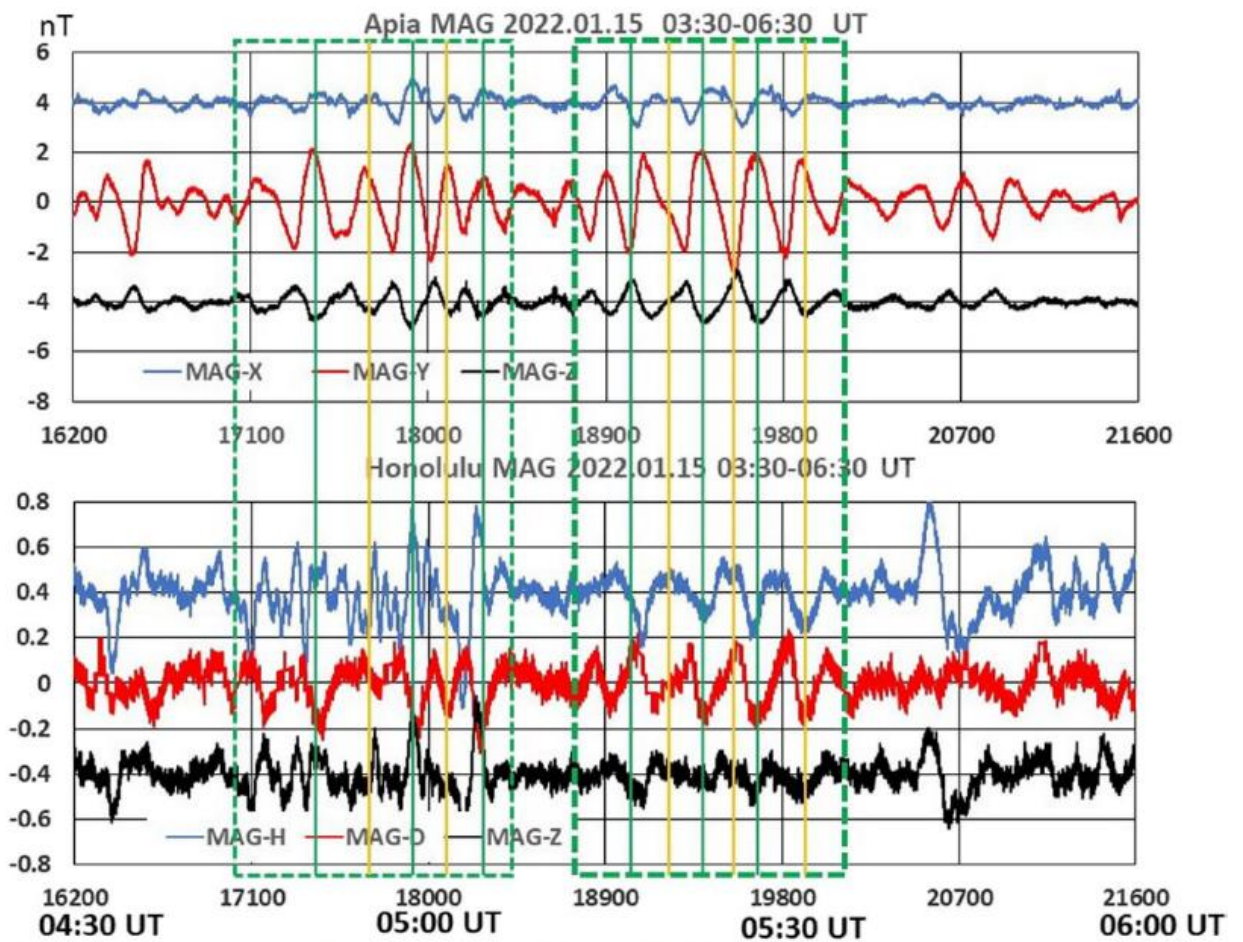

Fig. 10 Phase relation of magnetic field oscillations between Apia and Honolulu

The study by Le, G., Liu, G., Yizengaw, E., and Englert, C. R.: Intense equatorial electrojet and counter electrojet caused by the 15 January 2022 Tonga volcanic eruption: Space- and ground-based observations, *Geophysical Research Letters*, 49 (11), e2022GL099002, <https://doi.org/10.1029/2022GL099002>, 2022 presents an analysis indicating that the geomagnetic storm had a minimal impact on dayside equatorial electrodynamics:

# Geophysical Research Letters

## RESEARCH LETTER

10.1029/2022GL099002

### Key Points:

- Space- and ground-based observations reveal dramatic equatorial electrojet variations caused by the Tonga volcanic eruption
- Strong eastward turning of atmospheric zonal winds in the E-region is responsible for the directional reversal of the equatorial electrojet
- The observed complex spatiotemporal variations can be explained by a large-scale disturbance propagating eastward from the eruption site

### Correspondence to:

G. Le,  
Guan.Le@nasa.gov

### Citation:

Le, G., Liu, G., Yizengaw, E., & Englert, C. R. (2022). Intense equatorial electrojet and counter electrojet caused by the 15 January 2022 Tonga volcanic eruption: Space- and ground-based

## Intense Equatorial Electrojet and Counter Electrojet Caused by the 15 January 2022 Tonga Volcanic Eruption: Space- and Ground-Based Observations

Guan Le<sup>1</sup>, Guiping Liu<sup>1,2,3</sup>, Endawoke Yizengaw<sup>4</sup>, and Christoph R. Englert<sup>5</sup>

<sup>1</sup>ITM Physics Laboratory, Heliophysics Division, NASA Goddard Space Flight Center, Greenbelt, MD, USA, <sup>2</sup>The Catholic University of America, Washington, DC, USA, <sup>3</sup>Space Sciences Laboratory, University of California, Berkeley, CA, USA, <sup>4</sup>Space Science Application Laboratory, The Aerospace Corporation, El Segundo, CA, USA, <sup>5</sup>Space Science Division, U.S. Naval Research Laboratory, Washington, DC, USA

**Abstract** We present space- and ground-based multi-instrument observations demonstrating the impact of the 2022 Tonga volcanic eruption on dayside equatorial electrodynamics. A strong counter electrojet (CEJ) was observed by Swarm and ground-based magnetometers on 15 January after the Tonga eruption and during the recovery phase of a moderate geomagnetic storm. Swarm also observed an enhanced equatorial electrojet (EEJ) preceding the CEJ in the previous orbit. The observed EEJ and CEJ exhibited complex spatiotemporal variations. We combine them with the Ionospheric Connection Explorer neutral wind measurements to disentangle the potential mechanisms. Our analysis indicates that the geomagnetic storm had minimal impact; instead, a large-scale atmospheric disturbance propagating eastward from the Tonga eruption site was the most likely driver for the observed intensification and directional reversal of the equatorial electrojet. The CEJ was associated with strong eastward zonal winds in the E-region ionosphere, as a direct response to the lower atmosphere forcing.

Thus, our results have significantly complemented the results obtained by the authors of the papers listed above.

The author is grateful to Dr. Adrian Hitchman for the thorough and comprehensive review of the manuscript.

Sincerely,

Leonid Chernogor.

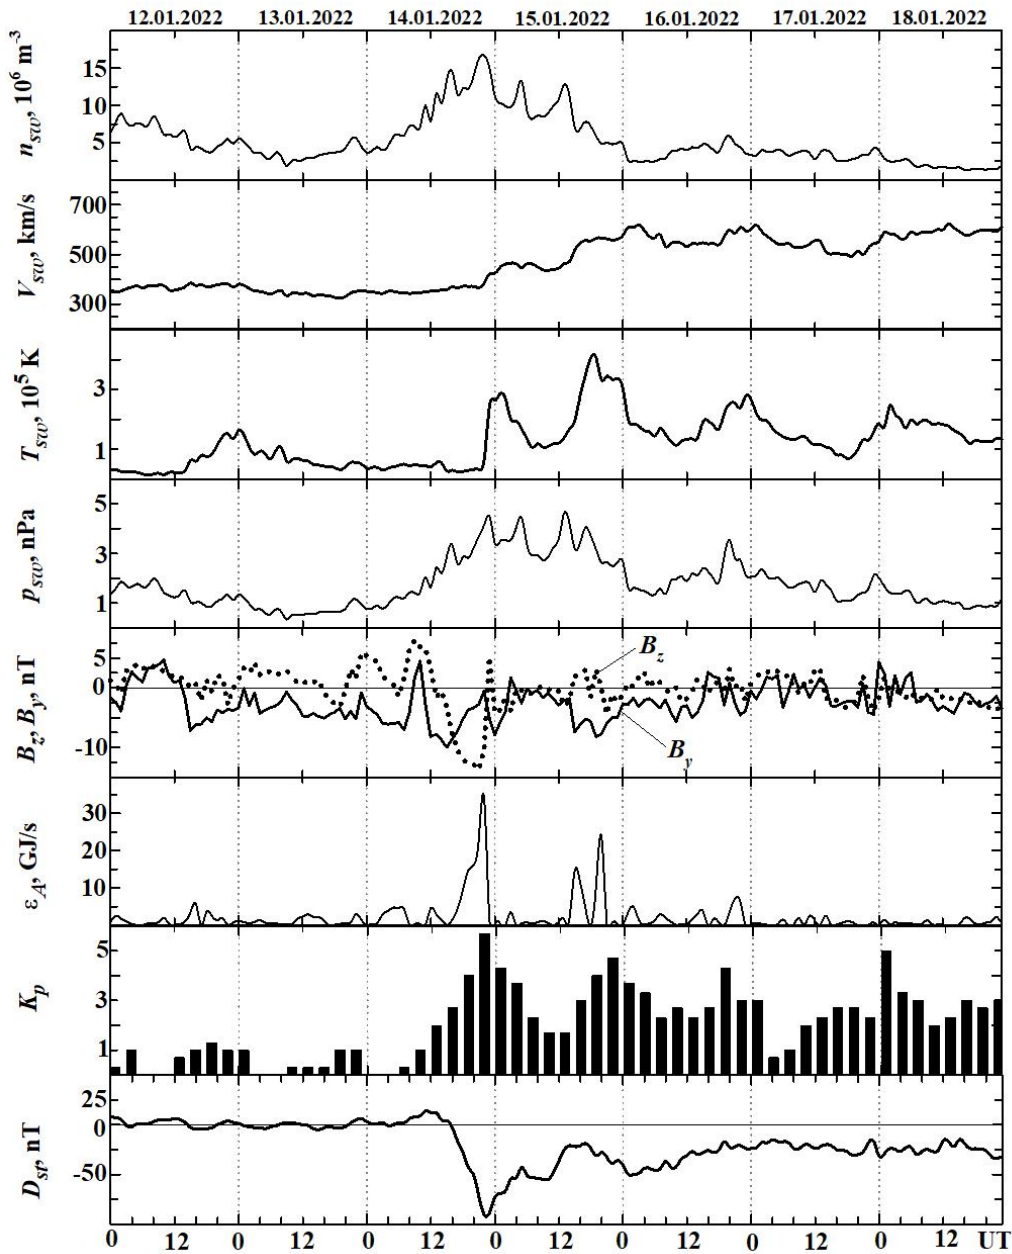

**Fig. 1.** UT variations in the solar wind parameters: measured concentration,  $n_{sw}$ , of particles, temperature  $T_{sw}$ , radial velocity  $V_{sw}$ , calculated dynamic pressure  $p_{sw}$ , measured  $B_z$  and  $B_y$  components of the interplanetary magnetic field; calculated values of the energy,  $\epsilon_A$ , transferred from the solar wind into the Earth's magnetosphere per unit time;  $K_p$ -index and  $D_{st}$ -index (retrieved from <https://omniweb.gsfc.nasa.gov/form/dx1.html>) for January 12 – 18, 2022 period. Dates are indicated along the upper abscissa.
